# Supplementary material for: Characterisation of Patients Referred to a Tertiary-Level Inherited Cardiac Condition Clinic with Suspected Arrhythmogenic Right Ventricular Cardiomyopathy (ARVC)
Source: Research Square preprint supplement (doi:10.21203/rs.3.rs-1804660/v1), 2022-07-25
Supplement: Supplementary file 1 [file 35d1a88164a1999d0130b337.docx]

**Characterisation of Patients Referred to a Tertiary Level Inherited Cardiac Condition Clinic with Suspected Arrhythmogenic Right Ventricular Cardiomyopathy (ARVC)**

**Supplementary**

**eTable 1**. Overview of patients with minor ARVC criteria only and family members of ARVC patients with ARVC excluded

| **Demographic** | ARVC excluded based on genetic testing (n=14) | Patients with Minor ARVC criteria (n=27) |
| --- | --- | --- |
| Age | 41± 18 | 39±16 |
| Male/ Female | 7/7 | 17/10 |
| weight(kg) | 79 ± 13.8 | 79.3± 19.4 |
| Height(cm) | 168 ± 8.7 | 172.5 ± 8.6 |
| Body Surface Area BSA(m²) | 1.9 ± 0.2 | 1.9±0.3 |
| Body Mass Index BMI (kg/m²) | 27.8±4.1 | 26.8 ±6 |
| **Echo** | | |
| 2D RA Area (cm2) | 16.4±3.9 | 14.7 ±3.5 |
| RVOT PLAX (cm) | 3.4 ± 0.7 | 2.7±0.4 |
| Proximal RVOT(RVOT1)PSAX(cm) | 2.9 ± 0.4 | 2.9 ±0.4 |
| 4C base RV1(cm) | 3.3 ± 0.5 | 3.4 ± 0.6 |
| 4C mid RV2 (cm) | 2.9 ±0.5 | 2.9±0.4 |
| 4C length RV3 (cm) | 6.2 ± 0.8 | 7±0.8 |
| RVEDA (cm2) | 19.8 ±3.2 | 20.9±6.1 |
| RVESA(cm2) | 10.4 ±2.2 | 9.5±3.3 |
| FAC(%) | 47 ± 8 | 54±11 |
| TAPSE(cm) | 2.5 ± 0.3 | 2.5±0.5 |
| EDV(ml) | 81.8 ±16.5 | 101.3±23.2 |
| ESV(ml) | 25.5±5.8 | 39.1±12.7 |
| EF (%) | 68 ± 6 | 63±5 |
| LA Area(cm²) | 16.1±5 | 16.4 ±3 |
| LA Volume(ml) | 44 ±19.8 | 40.6 ±11.6 |
| **ECG** | | |
| HR | 67.7 ±13.6 | 71.3±15.1 |
| PR interval(ms) | 157.2 ±31 | 144.9±20.5 |
| QRS duration(ms) | 101.4± 38.6 | 93.6±11 |
| QT(ms) | 388 ±32.3 | 384±36.8 |
| QTC(ms) | 406.3±28 | 403.5±25.5 |
| P axes | 39.9±33.1 | 44.8±24 |
| QRS axes | 40.6±35.9 | 38.4±39.3 |
| T axes | 34±15.1 | 39.7±20.3 |
| **SAECG** |  |  |
| Std.QRS durarion (unfiltered)(ms) | 90.0 ±11.8 | 94.4±10.1 |
| Total.QRS durartion(filtered)(ms) | 116 ± 27.3 | 103.5±11 |
| Duration of HFLA signals<40mv(ms) | 42.5 ±24.9 | 29.5±9.8 |
| RMS voltage in terminal 40 ms(mv) | 31.8 ± 22.3 | 44.1±27.2 |
| Mean voltage in terminal 40 ms(mv) | 23.6 ±12.5 | 28.6±16.8 |
| **Bio markers** | | |
| Na(mmol/L) | 140.3±1.7 | 140.4±1.9 |
| K(mmol/L) | 3.8 ±0.3 | 4±0.2 |
| Creatinine (umol/L) | 75.7 ±10 | 69.8±13.7 |
| NT-pro BNP (ng/L) | - | 78.5±43.5 |

*Abbreviations: Body surface area BSA, Body Mass Index BMI, N-terminal pro-B-type natriuretic peptide NT-proBNP, Sodium Na, Potassium K, right atrial area RA area,, Right ventricular outflow tract Parasternal long axis RVOT PLAX, Right ventricular outflow tract Parasternal short axis RVOT PSAX, 4 chamber Right ventricular basal diameter 4C base RV1, 4 chamber Right ventricular mid diameter 4C mid RV2, 4 chamber Right ventricular length 4C length RV3, Right ventricular end diastolic area RVEDA, Right ventricular end systolic area RVESA, Right ventricular fractional area change RVFAC, Tricuspid Annular Plane Systolic Excursion TAPSE, Left Ventricular End-Diastolic Volume LVEDD, Left Ventricular End-Systolic Volume LVESV, ejection fraction EF, Left atrial area*
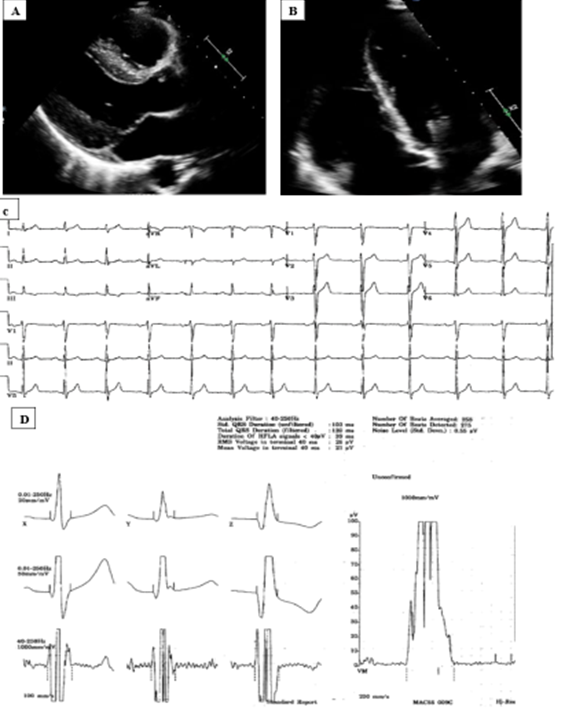
*LA area, Left atrial volume LA volume*

**eFigure 1**. 18 year old male with early stage ARVC and hence mild phenotype. Echocardiography shows normal RV and LV size and function (A and B). 12 lead ECG shows normal T wave with no epsilon wave (C). Signal-averaged ECG is positive for two of the three criteria. QRS duration filtered is 120 ms and duration of high low frequency signal is less than 40 μV at 39 ms.
